# Supplementary material
Source: ML conference proceedings conference paper supplement (https://openaccess.thecvf.com/content/cvpr_2015/html/Kading_Active_Learning_and_2015_CVPR_paper.html)
Supplement: Supplementary file 1 [file Kading_Active_Learning_and_2015_CVPR_supplemental.zip]

Archive with 3 entries (3 files):
- 2035-supp.pdf
- README.txt
- video-2035.mp4
