# Supplementary material
Source: ML conference proceedings conference paper supplement (https://openaccess.thecvf.com/content/cvpr_2015/html/Kading_Active_Learning_and_2015_CVPR_paper.html)
Supplement: Supplementary file 1 [file Kading_Active_Learning_and_2015_CVPR_supplemental.zip › README.txt]

The contained video was created with Microsoft PowerPoint and exported to .mp4, thus, a standard .264/AAC encoding is used.
In consequence, any standard video player should be able to show the video, e.g., linux's mplayer or Windows's Mediaplayer.
